# Supplementary material for: Visit-to-visit variability of glycemia and vascular complications: the Hoorn Diabetes Care System cohort
Source: Springer Nature journal article supplement (doi:10.1186/s12933-019-0975-1), 2019-12-01

a

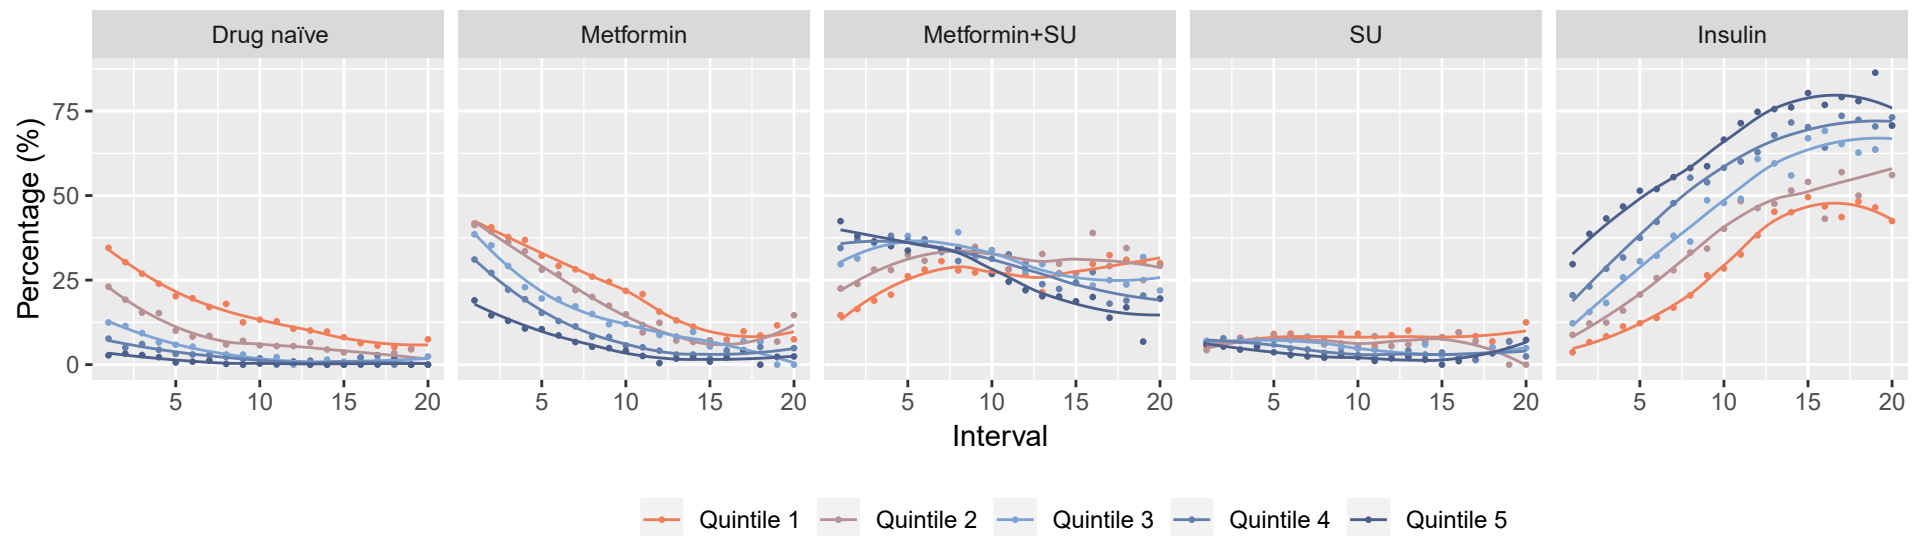

b

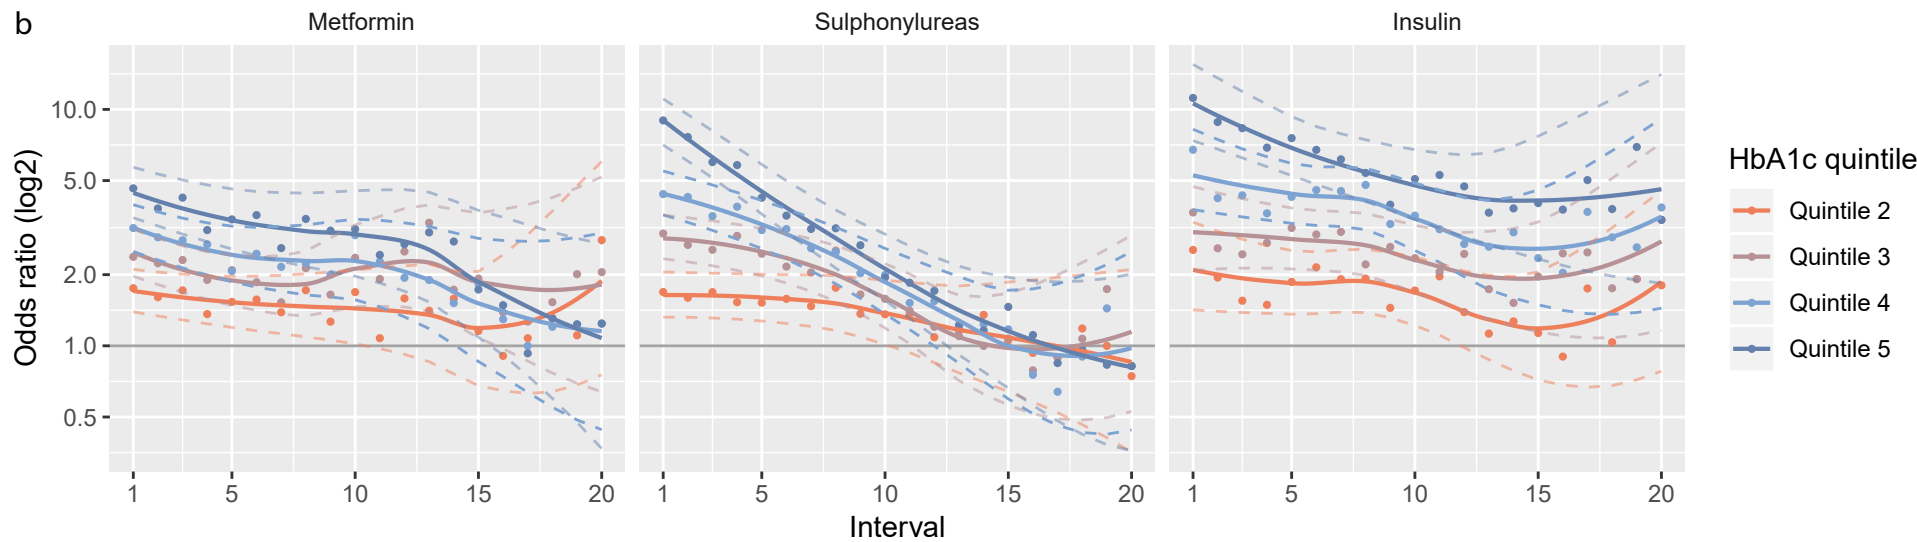

Supplement: MOESM9 [file 24656970]
