# Supplementary material for: Visit-to-visit variability of glycemia and vascular complications: the Hoorn Diabetes Care System cohort
Source: Cardiovasc Diabetol. 2019 Dec 12;18:170. doi: 10.1186/s12933-019-0975-1 (PMC6909524; doi:10.1186/s12933-019-0975-1)
Supplement: Supplementary file 3 — Additional file 3: Table S2. Characteristics of individuals across HbA1c-CV quintiles in the first interval. [file 12933_2019_975_MOESM3_ESM.xlsx]

## Sheet: Table S2
	All			Q1			Q2			Q3			Q4			Q5
	Mean	CI25%	CI75%	Mean	CI25%	CI75%	Mean	CI25%	CI75%	Mean	CI25%	CI75%	Mean	CI25%	CI75%	Mean	CI25%	CI75%
N	3970			793			794			794			794			795
Sex (%)	53			48			50			52			56			58
Age (years)	61.6	54.2	69.3	64	57.5	71.2	62.6	55.5	69.8	62.2	54.3	70.1	60.2	53.1	68.2	59.1	51.4	66.8
Time since diagnosis	1.1	0.9	1.2	1.1	1	1.2	1.1	1	1.2	1.1	1	1.2	1.1	0.9	1.2	1	0.9	1.2
BMI (kg/m2)	30.1	26.5	32.9	29.1	25.8	31.4	29.8	26.5	32.4	30	26.5	33.1	30.6	26.9	33.3	31	26.9	34
HbA1c (%)	6.7	6	7	6.2	5.9	6.5	6.4	6	6.7	6.5	6.1	6.9	6.8	6.1	7.3	7.7	6.3	8.7
HbA1c (mmol/mol)	50	42.1	53	44.8	41	47.5	46.3	42.1	49.7	48.1	43.2	51.9	50.3	43.2	56.3	60.5	45.4	71
Glucose (mmol/L)	7.7	6.7	8.4	7	6.3	7.6	7.3	6.6	7.9	7.6	6.7	8.2	7.9	6.8	8.6	8.9	7.2	10
HDL (mmol/L)	1.2	1	1.4	1.3	1.1	1.5	1.3	1.1	1.4	1.2	1	1.4	1.2	1	1.4	1.2	0.9	1.3
LDL (mmol/L)	3	2.2	3.6	3	2.3	3.6	3	2.2	3.6	2.9	2.2	3.5	3	2.2	3.6	3	2.4	3.7
Triaglycerol (mmol/L)	1.9	1.2	2.2	1.7	1.1	2	1.8	1.2	2.1	1.9	1.2	2.3	2	1.2	2.3	2.2	1.3	2.5
SBP (mmHg)	141.7	128	154	142.5	128	154	142.5	129	154	142.6	128	155	140.9	126	154	140.2	126	153
DBP (mmHg)	80.1	73	86	79.2	72	85	79.9	73.2	86	80	73	86	80.2	73	87	81.4	74	88
Metformin (%)	54			46			54			56			54			60
Sulfonylureas (%)	25			13			19			25			29			37
Insulin (%)	5			2			4			4			7			7
Other (%)	2			1			1			2			2			3
