# Supplementary material for: Visit-to-visit variability of glycemia and vascular complications: the Hoorn Diabetes Care System cohort
Source: Cardiovasc Diabetol. 2019 Dec 12;18:170. doi: 10.1186/s12933-019-0975-1 (PMC6909524; doi:10.1186/s12933-019-0975-1)
Supplement: Supplementary file 5 — Additional file 5: Figure S3. Characterization of individuals based on their HbA1c-CV. Unadjusted outcome against the five quintiles with the fifth quintile being the group with the highest FG-CV against (a) sex (% males) (b) age at diagnosis (c) BMI (d) % smokers (e) total cholesterol levels (f) HDL-C levels (g) triglycerides levels (h) DBP (i) SBP (j) eGFR. Lines represent loess smoothed levels over 5-year average values of outcomes. [file 12933_2019_975_MOESM5_ESM.xlsx]

## Sheet: Blad1
Table S3. Unadjusted and adjusted effect sizes of models with FG-CV for each quintiles.
Unadjusted		1		2		3		4		5		6		7		8		9		10		11		12		13		14		15		16		17		18		19		20
Variable	Quintile	Beta (95%CI)	Adjusted P-value	Beta (95%CI)	Adjusted P-value	Beta (95%CI)	Adjusted P-value	Beta (95%CI)	Adjusted P-value	Beta (95%CI)	Adjusted P-value	Beta (95%CI)	Adjusted P-value	Beta (95%CI)	Adjusted P-value	Beta (95%CI)	Adjusted P-value	Beta (95%CI)	Adjusted P-value	Beta (95%CI)	Adjusted P-value	Beta (95%CI)	Adjusted P-value	Beta (95%CI)	Adjusted P-value	Beta (95%CI)	Adjusted P-value	Beta (95%CI)	Adjusted P-value	Beta (95%CI)	Adjusted P-value	Beta (95%CI)	Adjusted P-value	Beta (95%CI)	Adjusted P-value	Beta (95%CI)	Adjusted P-value	Beta (95%CI)	Adjusted P-value	Beta (95%CI)	Adjusted P-value
Sex	2	1.01 (0.83-1.23)	1	0.95 (0.78-1.15)	1	0.86 (0.7-1.06)	1	1.17 (0.95-1.45)	1	1.05 (0.84-1.31)	1	1 (0.79-1.26)	1	0.86 (0.67-1.1)	1	0.92 (0.7-1.2)	1	1.12 (0.83-1.49)	1	1.01 (0.74-1.38)	1	0.9 (0.64-1.25)	1	0.85 (0.58-1.25)	1	1.02 (0.67-1.57)	1	1.13 (0.7-1.82)	1	1.11 (0.66-1.89)	1	1.35 (0.76-2.42)	1	1.32 (0.69-2.53)	1	1.23 (0.59-2.56)	1	0.76 (0.33-1.76)	1	1 (0.41-2.42)	1
Sex	3	0.97 (0.8-1.18)	1	0.86 (0.7-1.04)	1	0.91 (0.74-1.12)	1	1.08 (0.87-1.34)	1	1.02 (0.82-1.27)	1	1.14 (0.91-1.45)	1	1.01 (0.79-1.29)	1	1.13 (0.87-1.48)	1	1.47 (1.1-1.97)	0.17789	1.49 (1.09-2.04)	0.249886	1.13 (0.81-1.59)	1	1.47 (1-2.16)	0.954221	0.91 (0.59-1.39)	1	1.39 (0.86-2.25)	1	0.78 (0.46-1.32)	1	1.16 (0.65-2.07)	1	1.03 (0.54-1.97)	1	1.11 (0.54-2.3)	1	0.52 (0.22-1.22)	1	0.47 (0.19-1.14)	1
Sex	4	1.1 (0.91-1.34)	1	1.03 (0.84-1.25)	1	0.96 (0.78-1.18)	1	1.22 (0.99-1.51)	1	1.18 (0.95-1.47)	1	1.22 (0.97-1.54)	1	1.05 (0.81-1.34)	1	1.27 (0.97-1.66)	1	1.69 (1.27-2.27)	0.00819883	1.27 (0.93-1.74)	1	0.99 (0.71-1.39)	1	0.95 (0.65-1.39)	1	0.93 (0.61-1.43)	1	1.62 (1-2.63)	1	1.08 (0.63-1.82)	1	1.61 (0.9-2.9)	1	1.25 (0.65-2.39)	1	1.15 (0.55-2.39)	1	0.52 (0.22-1.22)	1	0.6 (0.25-1.46)	1
Sex	5	1.24 (1.02-1.51)	0.64982	1.31 (1.08-1.6)	0.142476	1.12 (0.91-1.37)	1	1.27 (1.02-1.57)	0.596325	1.2 (0.96-1.5)	1	1.22 (0.97-1.55)	1	1.11 (0.86-1.42)	1	1.13 (0.87-1.48)	1	1.38 (1.03-1.85)	0.590032	0.97 (0.71-1.32)	1	1.17 (0.83-1.64)	1	1.19 (0.82-1.74)	1	0.94 (0.61-1.44)	1	1.2 (0.74-1.94)	1	0.78 (0.46-1.32)	1	0.79 (0.44-1.41)	1	0.78 (0.41-1.5)	1	0.84 (0.41-1.75)	1	0.73 (0.31-1.68)	1	0.71 (0.29-1.69)	1
Time since diagnosis	2	-0.09	1	-0.2	1	-0.97	1	-0.59	1	-1.41	0.220692	-0.94	1	-1.62	0.170283	-1.44	0.552366	-1.31	1	-0.75	1	-0.84	1	-0.37	1	-1.86	1	0.53	1	0.13	1	0.59	1	-1.86	1	1.95	1	0.5	1	0.16	1
Time since diagnosis	3	-1.88	0.00665023	-1.51	0.070537	-1.93	0.00583681	-2.01	0.00467136	-2.38	0.000340407	-2.33	0.00118807	-2.73	0.000205874	-2.04	0.035117	-2.43	0.0094224	-0.57	1	-1.05	1	-1.35	1	-1.31	1	-0.4	1	-1.45	1	-1.26	1	-0.69	1	0.94	1	0.04	1	0.47	1
Time since diagnosis	4	-3.3	6.95775e-09	-2.44	5.49416e-05	-2.68	1.02576e-05	-3.32	2.61144e-08	-4.09	3.90681e-12	-3.33	2.21381e-07	-3.31	1.71066e-06	-2.62	0.00121599	-2.42	0.00982383	-1.75	0.387687	-2.41	0.0474233	-1.76	0.939297	-1.93	1	-1.78	1	-1.16	1	-1.57	1	-0.2	1	1.37	1	2.42	1	0.58	1
Time since diagnosis	5	-4.1	1.23996e-13	-3.99	3.28679e-13	-4.11	2.6196e-13	-4	5.69457e-12	-4.84	6.38041e-17	-4.49	2.76306e-13	-3.97	2.77313e-09	-3.45	2.83864e-06	-4.23	2.40124e-08	-3.78	8.74542e-06	-2.85	0.00674107	-3.48	0.00172663	-2.78	0.0977052	-3.4	0.0200664	-2.77	0.285274	0.01	1	-0.88	1	0.66	1	1.18	1	0.61	1
BMI	2	0.89	0.0114918	0.57	0.634913	0.44	1	0.23	1	0.15	1	0.48	1	0.76	0.437255	1.15	0.0202566	0.64	1	1.56	0.00346294	1.12	0.211555	0.53	1	0.86	1	0.99	1	1.12	1	2.07	0.198115	1.39	1	0.98	1	3.2	0.0927647	1.01	1
BMI	3	1.15	0.000173911	1.07	0.00118055	1.08	0.00184737	0.85	0.061207	1.03	0.00842479	1.04	0.0189826	1.12	0.0140245	1.27	0.00573698	1.08	0.0982065	1.01	0.29514	1.6	0.00569258	0.5	1	0.75	1	0.28	1	1.68	0.434836	1.51	1	2.76	0.0202087	1.27	1	2.89	0.208372	3.62	0.0280959
BMI	4	1.3	1.05008e-05	1.31	1.56286e-05	1.4	7.37155e-06	1.4	2.00452e-05	1.36	6.68448e-05	1.61	6.51508e-06	2.17	1.18956e-09	2.09	5.25307e-08	1.75	9.83639e-05	1.77	0.000426622	1.43	0.0229807	1.55	0.0383612	1.71	0.0733774	0.9	1	2.29	0.0355485	2.46	0.0442055	2.32	0.113331	1.41	1	3.67	0.0241246	2.89	0.219302
BMI	5	1.79	1.2114e-10	1.74	1.29803e-09	2.02	4.74181e-12	1.72	3.97753e-08	1.8	1.82783e-08	2.19	8.12371e-11	2.12	2.98995e-09	2.3	1.38526e-09	2.27	7.22515e-08	2.26	1.19628e-06	2.15	2.32484e-05	1.57	0.0338941	1.69	0.0816732	1.48	0.425083	2.53	0.0116267	3.67	0.000115043	2.26	0.136176	4.28	0.000182365	5.28	7.20246e-05	5.04	0.000222469
HDL	2	-0.02	1	-0.04	0.339737	-0.02	1	-0.06	0.00511575	-0.02	1	-0.06	0.0840211	-0.05	0.249534	-0.06	0.155757	-0.08	0.00743817	-0.08	0.0172296	-0.07	0.228444	-0.06	1	-0.04	1	-0.12	0.116448	-0.16	0.0155859	-0.21	0.000944423	-0.14	0.302488	-0.06	1	-0.15	0.696029	-0.09	1
HDL	3	-0.04	0.158493	-0.05	0.0186417	-0.05	0.029081	-0.09	5.13598e-06	-0.07	0.00350834	-0.09	0.000129906	-0.08	0.00120162	-0.09	0.000284682	-0.09	0.00107071	-0.13	1.9825e-06	-0.1	0.00560093	-0.13	0.00123034	-0.06	1	-0.11	0.179592	-0.08	1	-0.14	0.104513	-0.17	0.0682821	-0.14	0.508862	-0.2	0.132263	-0.23	0.0542683
HDL	4	-0.09	1.3848e-07	-0.1	4.46956e-09	-0.11	1.41027e-10	-0.11	2.40815e-09	-0.11	3.29932e-08	-0.13	9.9904e-10	-0.12	1.67379e-07	-0.14	7.95139e-09	-0.17	3.24561e-11	-0.17	4.37792e-10	-0.13	0.000167005	-0.09	0.0547765	-0.09	0.262064	-0.13	0.0262687	-0.16	0.0172041	-0.21	0.000602709	-0.19	0.0197038	-0.2	0.0269667	-0.17	0.394425	-0.1	1
HDL	5	-0.13	1.01595e-13	-0.14	2.5172e-17	-0.13	3.31249e-13	-0.16	5.85599e-19	-0.14	7.26152e-13	-0.14	1.00528e-11	-0.14	6.06387e-10	-0.14	6.7721e-10	-0.14	1.55829e-07	-0.14	1.83512e-07	-0.13	8.46261e-05	-0.15	3.33373e-05	-0.1	0.091885	-0.12	0.0580684	-0.11	0.353865	-0.13	0.22559	-0.16	0.138197	-0.24	0.00230593	-0.26	0.00695877	-0.25	0.0268245
Triaglycerol (log10)	2	0.02	0.991744	0.01	1	0.01	1	0.03	0.360472	0.02	0.795071	0	1	0.01	1	0.02	1	0.02	1	0.02	1	0.02	1	0.04	1	0.04	1	0.04	1	0.05	1	0.09	0.0193456	0.08	0.273287	0.01	1	0.04	1	-0.01	1
Triaglycerol (log10)	3	0.03	0.0995932	0.05	3.34416e-05	0.03	0.442294	0.04	0.00744787	0.04	0.0161219	0.03	0.365859	0.03	0.427767	0.02	1	0.02	1	0.04	0.307405	0.03	1	0.04	0.435334	0.04	0.35672	0.03	1	0.04	1	0.06	0.797661	0.04	1	0.06	1	0.08	1	0.07	1
Triaglycerol (log10)	4	0.06	1.04892e-06	0.06	4.484e-09	0.06	3.62117e-08	0.05	9.47788e-06	0.06	9.75699e-07	0.05	0.000130701	0.05	0.0144012	0.05	0.0451153	0.05	0.00336448	0.07	0.000322736	0.06	0.00281394	0.03	1	0.04	1	0.02	1	0.05	1	0.07	0.102456	0.04	1	0.03	1	0.07	1	0.04	1
Triaglycerol (log10)	5	0.08	6.34336e-14	0.08	1.37091e-16	0.07	1.12042e-10	0.08	7.71602e-14	0.07	1.61647e-08	0.06	1.38174e-06	0.06	3.70171e-07	0.06	9.16644e-06	0.05	0.00184873	0.05	0.0147701	0.05	0.0412233	0.07	0.00309986	0.07	0.000922854	0.07	0.0413424	0.04	1	0.08	0.0467066	0.1	0.0147344	0.07	0.401801	0.1	0.0870154	0.11	0.151411
SBP	2	2.53	0.0649563	-0.38	1	-1.38	1	-0.08	1	0	1	-1.55	1	-0.25	1	1.57	1	-0.64	1	-2.09	1	-0.1	1	-1.55	1	1.03	1	2.57	1	3.19	1	2.39	1	-2.23	1	2.3	1	2.28	1	-2.41	1
SBP	3	0.84	1	0.16	1	0.04	1	1.96	0.771492	0.3	1	-1.73	1	-0.57	1	1.6	1	0.69	1	1.28	1	1.49	1	-0.57	1	1.3	1	1.59	1	0.73	1	-1	1	-0.15	1	0.78	1	-1.23	1	4.52	1
SBP	4	-0.15	1	-0.79	1	0.35	1	0.67	1	-1.24	1	-1.36	1	-0.65	1	2.18	1	0.97	1	1.69	1	0.5	1	0.75	1	0.88	1	-0.26	1	3.92	1	-1.64	1	1.74	1	3.56	1	9.08	0.477141	6.05	1
SBP	5	-0.12	1	-0.82	1	-0.06	1	0.08	1	-0.39	1	-1.35	1	-2.01	1	-1.54	1	-0.74	1	-1.53	1	-0.07	1	-2.32	1	1.47	1	-1.55	1	1.7	1	1.38	1	-1.37	1	5.28	1	1.84	1	-1.37	1
DBP	2	0.23	1	-0.36	1	-0.58	1	0.22	1	0.62	1	-0.35	1	-0.07	1	0.4	1	0.22	1	0.28	1	-0.25	1	-0.94	1	0.05	1	0	1	1.15	1	0.98	1	-0.49	1	1.1	1	0.35	1	0.24	1
DBP	3	0.31	1	0.18	1	0.28	1	1.24	0.060762	1	0.40667	0.47	1	0.95	1	1.27	0.259076	1.35	0.276685	0.6	1	0.16	1	-0.12	1	-0.12	1	0.42	1	0.31	1	0.16	1	0.38	1	-1.18	1	-1.8	1	-0.1	1
DBP	4	0.59	1	0.41	1	0.83	0.820728	1.25	0.0560171	1.29	0.0542641	1.13	0.255579	0.95	0.987095	1.01	0.991143	0.72	1	0.32	1	0.15	1	-0.07	1	-0.38	1	-0.55	1	0.87	1	1.06	1	0.39	1	-0.19	1	-2.2	1	-1.33	1
DBP	5	0.85	0.572911	0.75	1	0.76	1	0.9	0.656189	1.51	0.00902394	0.57	1	-0.17	1	-0.01	1	0.9	1	0.83	1	0.15	1	0.2	1	0.25	1	0.09	1	0.74	1	0.16	1	-1.82	1	-1.04	1	-1.83	1	-2.33	1
Smoking	2	0.96 (0.73-1.26)	1	0.71 (0.54-0.93)	0.300472	0.98 (0.73-1.3)	1	1.24 (0.92-1.67)	1	1.43 (1.05-1.97)	0.518791	1.09 (0.78-1.51)	1	0.98 (0.69-1.4)	1	1.18 (0.79-1.76)	1	0.93 (0.59-1.44)	1	0.74 (0.45-1.2)	1	1.51 (0.86-2.7)	1	0.95 (0.53-1.71)	1	0.74 (0.37-1.46)	1	0.69 (0.29-1.6)	1	0.64 (0.24-1.62)	1	1.38 (0.56-3.56)	1	1.67 (0.62-4.8)	1	0.47 (0.1-1.89)	1	2.1 (0.39-15.75)	1	1.37 (0.28-7.37)	1
Smoking	3	1.16 (0.89-1.51)	1	1.05 (0.81-1.36)	1	1.32 (1.01-1.74)	0.92498	1.19 (0.88-1.61)	1	1.38 (1.01-1.9)	0.902909	1.1 (0.8-1.53)	1	1.02 (0.71-1.45)	1	1.31 (0.89-1.95)	1	1.17 (0.77-1.8)	1	0.86 (0.54-1.38)	1	1.46 (0.82-2.61)	1	1.22 (0.7-2.14)	1	0.89 (0.46-1.73)	1	1.33 (0.63-2.84)	1	1.19 (0.52-2.75)	1	0.87 (0.31-2.37)	1	0.99 (0.32-3.03)	1	1.36 (0.44-4.39)	1	3.32 (0.71-23.57)	1	1.33 (0.28-7.16)	1
Smoking	4	1.38 (1.07-1.78)	0.290146	1.02 (0.79-1.32)	1	1.44 (1.1-1.89)	0.160233	1.35 (1.01-1.81)	0.904428	1.63 (1.2-2.23)	0.0398084	1.42 (1.04-1.95)	0.53984	1.31 (0.93-1.84)	1	1.46 (1-2.15)	1	1.45 (0.96-2.19)	1	1.05 (0.67-1.66)	1	1.89 (1.1-3.34)	0.467266	1.04 (0.58-1.85)	1	1.34 (0.73-2.5)	1	2.06 (1.04-4.25)	0.849446	1.92 (0.91-4.25)	1	1.79 (0.75-4.49)	1	1.5 (0.54-4.35)	1	1 (0.29-3.39)	1	6.18 (1.5-41.98)	0.48521	2.62 (0.67-12.91)	1
Smoking	5	1.71 (1.33-2.19)	0.000519273	1.39 (1.09-1.78)	0.18227	1.49 (1.14-1.95)	0.0764869	1.72 (1.3-2.29)	0.00370671	1.75 (1.29-2.39)	0.00734379	1.45 (1.06-1.99)	0.380178	1.51 (1.08-2.11)	0.315008	1.86 (1.29-2.72)	0.0210825	1.58 (1.06-2.39)	0.536646	1.45 (0.95-2.24)	1	2.01 (1.17-3.53)	0.252164	1.6 (0.94-2.77)	1	1.63 (0.9-3.01)	1	1.87 (0.93-3.88)	1	1.6 (0.74-3.58)	1	1.77 (0.75-4.44)	1	2.2 (0.86-6.15)	1	2.7 (0.99-8.15)	1	2.62 (0.53-19.07)	1	0.97 (0.17-5.55)	1
Total cholesterol	2	0.04	1	0	1	-0.01	1	0	1	-0.07	1	-0.08	1	-0.06	1	-0.13	0.546933	-0.1	1	-0.11	1	-0.06	1	0.07	1	0.02	1	0.05	1	-0.13	1	0.06	1	-0.03	1	-0.32	1	0	1	-0.12	1
Total cholesterol	3	-0.02	1	0.03	1	-0.03	1	-0.01	1	-0.06	1	-0.09	1	-0.11	0.945511	-0.12	0.976525	-0.08	1	-0.12	1	0.04	1	0.01	1	0.01	1	-0.01	1	0.01	1	0.05	1	-0.3	1	-0.26	1	-0.17	1	-0.07	1
Total cholesterol	4	0.01	1	0.01	1	-0.04	1	-0.03	1	-0.06	1	-0.06	1	-0.12	0.702277	-0.19	0.0291309	-0.09	1	-0.06	1	0.07	1	0.05	1	-0.06	1	-0.15	1	-0.2	1	-0.19	1	-0.28	1	-0.43	0.247901	-0.28	1	-0.07	1
Total cholesterol	5	0.09	1	0.05	1	0.08	1	0.09	1	-0.01	1	0	1	-0.02	1	-0.03	1	0.05	1	0.04	1	0.06	1	0.13	1	0.19	0.962886	0.2	1	0.11	1	0.18	1	-0.19	1	-0.24	1	-0.13	1	-0.17	1
eGFR	2	-1.33	1	-3.08	0.948659	-1.88	1	-2.89	1	-1.04	1	-1.65	1	-3.57	1	0.37	1	0.77	1	-0.02	1	2.13	1	2.32	1	-1.63	1	-3.51	1	-4.53	1	-3.33	1	-2.71	1	3.52	1	2.3	1	10.35	1
eGFR	3	-0.81	1	-1.69	1	-0.81	1	-1.3	1	1.73	1	2.04	1	-2.8	1	1.55	1	3.64	1	-2.17	1	-2.33	1	-0.5	1	3.65	1	-3.99	1	-0.7	1	-7.08	0.243339	5.46	1	4.93	1	7.93	1	-0.13	1
eGFR	4	1.07	1	-2.49	1	-2.68	1	-3.02	1	-1.21	1	-0.32	1	-2.35	1	-1.33	1	-3.3	1	-3.88	0.68127	-2.57	1	-3.55	1	3.66	1	-2.15	1	-3.54	1	-1.3	1	0.27	1	2.92	1	-3.45	1	-3.53	1
eGFR	5	-1.04	1	-3.72	0.33734	-1.93	1	-3.98	0.981395	-1.28	1	-0.72	1	-3.57	1	-0.63	1	-0.73	1	-0.57	1	1.02	1	-1.57	1	-3.88	1	-0.88	1	1.34	1	-2.32	1	-1.23	1	-1.41	1	-3.86	1	-3.89	1
Adjusted model		1		2		3		4		5		6		7		8		9		10		11		12		13		14		15		16		17		18		19		20
Variable	Quintile	Beta (95%CI)	Adjusted P-value	Beta (95%CI)	Adjusted P-value	Beta (95%CI)	Adjusted P-value	Beta (95%CI)	Adjusted P-value	Beta (95%CI)	Adjusted P-value	Beta (95%CI)	Adjusted P-value	Beta (95%CI)	Adjusted P-value	Beta (95%CI)	Adjusted P-value	Beta (95%CI)	Adjusted P-value	Beta (95%CI)	Adjusted P-value	Beta (95%CI)	Adjusted P-value	Beta (95%CI)	Adjusted P-value	Beta (95%CI)	Adjusted P-value	Beta (95%CI)	Adjusted P-value	Beta (95%CI)	Adjusted P-value	Beta (95%CI)	Adjusted P-value	Beta (95%CI)	Adjusted P-value	Beta (95%CI)	Adjusted P-value	Beta (95%CI)	Adjusted P-value	Beta (95%CI)	Adjusted P-value
Sex	2	0.96 (0.79-1.18)	1	0.89 (0.73-1.09)	1	0.82 (0.66-1)	1	1.11 (0.89-1.38)	1	0.98 (0.78-1.22)	1	0.95 (0.75-1.21)	1	0.8 (0.62-1.03)	1	0.85 (0.65-1.12)	1	1.04 (0.78-1.4)	1	0.96 (0.7-1.31)	1	0.85 (0.6-1.2)	1	0.84 (0.57-1.23)	1	0.97 (0.63-1.49)	1	1.13 (0.7-1.84)	1	1.11 (0.65-1.9)	1	1.29 (0.71-2.34)	1	1.2 (0.62-2.34)	1	1.35 (0.64-2.88)	1	0.79 (0.33-1.87)	1	1.02 (0.42-2.52)	1
Sex	3	0.87 (0.71-1.06)	1	0.76 (0.62-0.93)	0.165648	0.81 (0.66-1)	0.951134	0.95 (0.76-1.18)	1	0.9 (0.72-1.13)	1	1.01 (0.8-1.28)	1	0.88 (0.68-1.14)	1	1.02 (0.78-1.34)	1	1.32 (0.98-1.77)	1	1.44 (1.05-1.98)	0.505954	1.07 (0.76-1.51)	1	1.41 (0.95-2.07)	1	0.87 (0.57-1.34)	1	1.33 (0.82-2.17)	1	0.72 (0.42-1.24)	1	1.05 (0.58-1.89)	1	0.96 (0.5-1.87)	1	1.15 (0.55-2.42)	1	0.51 (0.21-1.22)	1	0.47 (0.19-1.16)	1
Sex	4	0.93 (0.75-1.14)	1	0.86 (0.7-1.05)	1	0.81 (0.66-1)	1	1.01 (0.81-1.26)	1	0.99 (0.79-1.24)	1	1.04 (0.82-1.32)	1	0.89 (0.68-1.14)	1	1.11 (0.84-1.46)	1	1.51 (1.12-2.04)	0.13506	1.15 (0.83-1.58)	1	0.89 (0.63-1.25)	1	0.89 (0.61-1.31)	1	0.88 (0.57-1.35)	1	1.49 (0.91-2.44)	1	1.01 (0.59-1.74)	1	1.42 (0.79-2.6)	1	1.2 (0.61-2.33)	1	1.21 (0.57-2.57)	1	0.59 (0.24-1.43)	1	0.61 (0.25-1.51)	1
Sex	5	0.93 (0.75-1.16)	1	0.98 (0.79-1.21)	1	0.85 (0.68-1.06)	1	0.97 (0.78-1.22)	1	0.93 (0.73-1.17)	1	0.98 (0.76-1.25)	1	0.89 (0.68-1.16)	1	0.94 (0.71-1.24)	1	1.13 (0.84-1.53)	1	0.81 (0.58-1.12)	1	1.02 (0.72-1.45)	1	1.06 (0.71-1.56)	1	0.87 (0.56-1.35)	1	1.02 (0.62-1.68)	1	0.67 (0.39-1.17)	1	0.7 (0.38-1.28)	1	0.69 (0.35-1.36)	1	0.83 (0.39-1.76)	1	0.75 (0.31-1.8)	1	0.72 (0.29-1.76)	1
Time since diagnosis	2	0.26	1	0.19	1	-0.72	1	-0.09	1	-1.07	0.220692	-0.68	1	-1.45	0.170283	-1.16	0.552366	-0.9	1	-0.31	1	-0.51	1	-0.1	1	-1.52	1	0.75	1	0.49	1	0.88	1	-1.56	1	2.21	1	0.12	1	0.15	1
Time since diagnosis	3	-1.32	0.00665023	-0.9	0.070537	-1.27	0.00583681	-1.18	0.00467136	-1.76	0.000340407	-1.55	0.00118807	-2.19	0.000205874	-1.46	0.035117	-1.61	0.0094224	0.08	1	-0.57	1	-0.66	1	-1.02	1	0.12	1	-1.47	1	-1.1	1	-0.38	1	1.12	1	-0.79	1	-0.11	1
Time since diagnosis	4	-2.37	6.95775e-09	-1.32	5.49416e-05	-1.6	1.02576e-05	-2.14	2.61144e-08	-3.17	3.90681e-12	-2.34	2.21381e-07	-2.56	1.71066e-06	-1.78	0.00121599	-1.46	0.00982383	-0.84	0.387687	-1.82	0.0474233	-1.22	0.939297	-1.25	1	-1.17	1	-0.75	1	-1.17	1	0.27	1	1.62	1	1.73	1	0.19	1
Time since diagnosis	5	-2.39	1.23996e-13	-2.05	3.28679e-13	-2.22	2.6196e-13	-2.25	5.69457e-12	-3.35	6.38041e-17	-3.1	2.76306e-13	-2.86	2.77313e-09	-2.42	2.83864e-06	-3.04	2.40124e-08	-2.94	8.74542e-06	-1.91	0.00674107	-2.41	0.00172663	-1.87	0.0977052	-2.86	0.0200664	-2.42	0.285274	-0.08	1	-0.57	1	0.78	1	1.15	1	0.35	1
BMI	2	0.76	0.0114918	0.39	0.634913	0.18	1	0.09	1	-0.1	1	0.29	1	0.43	0.437255	0.87	0.0202566	0.48	1	1.33	0.00346294	0.84	0.211555	0.25	1	0.57	1	0.93	1	0.91	1	2.05	0.198115	1.45	1	1.25	1	3.05	0.0927647	1.09	1
BMI	3	0.77	0.000173911	0.64	0.00118055	0.64	0.00184737	0.39	0.061207	0.56	0.00842479	0.65	0.0189826	0.68	0.0140245	0.99	0.00573698	0.91	0.0982065	1.06	0.29514	1.45	0.00569258	0.48	1	0.39	1	0.14	1	1.32	0.434836	1.33	1	2.65	0.0202087	1.38	1	2.41	0.208372	3.2	0.0280959
BMI	4	0.73	1.05008e-05	0.76	1.56286e-05	0.81	7.37155e-06	0.78	2.00452e-05	0.72	6.68448e-05	1.11	6.51508e-06	1.62	1.18956e-09	1.77	5.25307e-08	1.66	9.83639e-05	1.48	0.000426622	1.01	0.0229807	1.18	0.0383612	1.1	0.0733774	0.8	1	1.95	0.0355485	2.44	0.0442055	2.34	0.113331	1.56	1	3.42	0.0241246	2.59	0.219302
BMI	5	0.92	1.2114e-10	0.93	1.29803e-09	1.15	4.74181e-12	0.83	3.97753e-08	0.86	1.82783e-08	1.45	8.12371e-11	1.42	2.98995e-09	1.74	1.38526e-09	1.78	7.22515e-08	1.6	1.19628e-06	1.69	2.32484e-05	1.08	0.0338941	0.88	0.0816732	0.94	0.425083	1.76	0.0116267	3.13	0.000115043	1.93	0.136176	4.1	0.000182365	5.17	7.20246e-05	4.82	0.000222469
HDL	2	-0.01	1	-0.03	0.339737	-0.02	1	-0.05	0.00511575	0	1	-0.05	0.0840211	-0.05	0.249534	-0.05	0.155757	-0.07	0.00743817	-0.07	0.0172296	-0.07	0.228444	-0.06	1	-0.03	1	-0.11	0.116448	-0.14	0.0155859	-0.19	0.000944423	-0.13	0.302488	-0.06	1	-0.16	0.696029	-0.09	1
HDL	3	-0.02	0.158493	-0.04	0.0186417	-0.04	0.029081	-0.07	5.13598e-06	-0.05	0.00350834	-0.06	0.000129906	-0.07	0.00120162	-0.07	0.000284682	-0.06	0.00107071	-0.11	1.9825e-06	-0.09	0.00560093	-0.1	0.00123034	-0.06	1	-0.08	0.179592	-0.08	1	-0.13	0.104513	-0.16	0.0682821	-0.14	0.508862	-0.22	0.132263	-0.26	0.0542683
HDL	4	-0.05	1.3848e-07	-0.07	4.46956e-09	-0.09	1.41027e-10	-0.08	2.40815e-09	-0.08	3.29932e-08	-0.1	9.9904e-10	-0.1	1.67379e-07	-0.1	7.95139e-09	-0.12	3.24561e-11	-0.14	4.37792e-10	-0.11	0.000167005	-0.09	0.0547765	-0.08	0.262064	-0.1	0.0262687	-0.14	0.0172041	-0.19	0.000602709	-0.17	0.0197038	-0.2	0.0269667	-0.2	0.394425	-0.12	1
HDL	5	-0.06	1.01595e-13	-0.08	2.5172e-17	-0.08	3.31249e-13	-0.11	5.85599e-19	-0.09	7.26152e-13	-0.1	1.00528e-11	-0.1	6.06387e-10	-0.11	6.7721e-10	-0.08	1.55829e-07	-0.12	1.83512e-07	-0.1	8.46261e-05	-0.12	3.33373e-05	-0.09	0.091885	-0.1	0.0580684	-0.1	0.353865	-0.13	0.22559	-0.15	0.138197	-0.25	0.00230593	-0.28	0.00695877	-0.26	0.0268245
Triaglycerol (log10)	2	0.01	0.991744	0.01	1	0	1	0.02	0.360472	0.01	0.795071	-0.01	1	0	1	0	1	0.01	1	0.01	1	0.01	1	0.03	1	0.03	1	0.04	1	0.03	1	0.08	0.0193456	0.08	0.273287	0.01	1	0.04	1	-0.01	1
Triaglycerol (log10)	3	0.01	0.0995932	0.03	3.34416e-05	0.01	0.442294	0.02	0.00744787	0.02	0.0161219	0.01	0.365859	0.01	0.427767	0.01	1	0	1	0.03	0.307405	0.02	1	0.03	0.435334	0.03	0.35672	0.01	1	0.03	1	0.05	0.797661	0.03	1	0.06	1	0.08	1	0.07	1
Triaglycerol (log10)	4	0.03	1.04892e-06	0.04	4.484e-09	0.04	3.62117e-08	0.02	9.47788e-06	0.03	9.75699e-07	0.03	0.000130701	0.02	0.0144012	0.03	0.0451153	0.03	0.00336448	0.05	0.000322736	0.04	0.00281394	0.02	1	0.02	1	0	1	0.03	1	0.06	0.102456	0.03	1	0.03	1	0.07	1	0.04	1
Triaglycerol (log10)	5	0.03	6.34336e-14	0.04	1.37091e-16	0.02	1.12042e-10	0.04	7.71602e-14	0.03	1.61647e-08	0.03	1.38174e-06	0.03	3.70171e-07	0.03	9.16644e-06	0.02	0.00184873	0.02	0.0147701	0.02	0.0412233	0.04	0.00309986	0.04	0.000922854	0.04	0.0413424	0.01	1	0.06	0.0467066	0.08	0.0147344	0.06	0.401801	0.09	0.0870154	0.1	0.151411
SBP	2	2.03	0.0649563	-0.81	1	-1.19	1	-0.08	1	0.62	1	-1.18	1	0.3	1	2.13	1	0.11	1	-1.98	1	-0.1	1	-1.92	1	1.71	1	1.99	1	2.44	1	1.03	1	-1.37	1	1.15	1	2.03	1	-2.17	1
SBP	3	1.24	1	0.25	1	0.47	1	2.37	0.771492	1.18	1	-0.98	1	0.43	1	2.56	1	2.25	1	1.54	1	1.75	1	-0.1	1	1.51	1	1.56	1	0.76	1	-1.1	1	-0.64	1	0.04	1	-1.39	1	3.91	1
SBP	4	0.81	1	-0.53	1	0.86	1	1.69	1	0.62	1	-0.1	1	0.45	1	3.36	1	2.54	1	2.22	1	1.33	1	1.04	1	1.05	1	0.58	1	3.64	1	-1.61	1	1.15	1	2.48	1	7.61	0.477141	5.34	1
SBP	5	0.31	1	-0.24	1	0.62	1	0.89	1	1.28	1	0.11	1	-0.91	1	-0.11	1	1.57	1	-0.08	1	0.82	1	-1.33	1	1.57	1	-0.15	1	1.56	1	-0.35	1	-2.47	1	3.85	1	0.4	1	-2.28	1
DBP	2	-0.06	1	-0.64	1	-0.78	1	-0.16	1	0.26	1	-0.65	1	-0.45	1	0.01	1	-0.18	1	-0.08	1	-0.53	1	-1.06	1	-0.42	1	-0.14	1	0.8	1	0.49	1	-1.15	1	1.37	1	0.6	1	0.45	1
DBP	3	-0.26	1	-0.34	1	-0.26	1	0.55	0.060762	0.37	0.40667	-0.32	1	0.13	1	0.58	0.259076	0.59	0.276685	0.14	1	-0.24	1	-0.67	1	-0.46	1	-0.18	1	-0.06	1	-0.42	1	0.05	1	-1.12	1	-1.57	1	0.38	1
DBP	4	-0.37	1	-0.56	1	-0.03	0.820728	0.2	0.0560171	0.28	0.0542641	0.08	0.255579	-0.13	0.987095	0.07	0.991143	-0.09	1	-0.44	1	-0.51	1	-0.56	1	-0.99	1	-1.4	1	0.21	1	0.2	1	0.06	1	-0.09	1	-1.35	1	-1	1
DBP	5	-0.81	0.572911	-0.95	1	-0.72	1	-0.57	0.656189	0.07	0.00902394	-0.84	1	-1.65	1	-1.21	1	-0.28	1	-0.18	1	-0.77	1	-0.83	1	-0.59	1	-0.94	1	-0.35	1	-0.33	1	-2.24	1	-1.1	1	-1.38	1	-2.12	1
Smoking	2	0.96 (0.73-1.27)	1	0.7 (0.53-0.93)	0.278068	0.96 (0.72-1.28)	1	1.22 (0.9-1.65)	1	1.36 (0.99-1.88)	1	1.03 (0.74-1.44)	1	0.9 (0.62-1.29)	1	1.06 (0.71-1.6)	1	0.8 (0.51-1.27)	1	0.67 (0.41-1.1)	1	1.44 (0.81-2.6)	1	0.9 (0.49-1.65)	1	0.65 (0.32-1.31)	1	0.73 (0.3-1.74)	1	0.65 (0.24-1.68)	1	1.52 (0.6-4.04)	1	1.53 (0.56-4.44)	1	0.52 (0.1-2.09)	1	2.26 (0.41-17.12)	1	1.35 (0.27-7.4)	1
Smoking	3	1.1 (0.84-1.44)	1	1.01 (0.77-1.31)	1	1.26 (0.95-1.67)	1	1.12 (0.83-1.53)	1	1.26 (0.92-1.75)	1	0.97 (0.7-1.36)	1	0.84 (0.59-1.22)	1	1.11 (0.75-1.67)	1	0.92 (0.59-1.42)	1	0.78 (0.48-1.25)	1	1.36 (0.76-2.46)	1	1.09 (0.62-1.95)	1	0.8 (0.4-1.59)	1	1.36 (0.63-3)	1	1.09 (0.47-2.57)	1	0.78 (0.27-2.18)	1	1 (0.32-3.12)	1	1.45 (0.46-4.74)	1	3.49 (0.73-25.28)	1	1.25 (0.25-6.88)	1
Smoking	4	1.22 (0.94-1.6)	1	0.93 (0.71-1.22)	1	1.35 (1.02-1.79)	0.767514	1.22 (0.9-1.65)	1	1.4 (1.02-1.93)	0.810823	1.2 (0.87-1.66)	1	1.04 (0.73-1.49)	1	1.18 (0.79-1.76)	1	1.11 (0.73-1.71)	1	0.87 (0.54-1.4)	1	1.6 (0.91-2.86)	1	0.88 (0.48-1.6)	1	1.21 (0.64-2.32)	1	1.89 (0.93-4.01)	1	1.84 (0.84-4.19)	1	1.62 (0.66-4.19)	1	1.51 (0.54-4.47)	1	1.07 (0.31-3.68)	1	7.7 (1.81-53.52)	0.263604	2.57 (0.63-13)	1
Smoking	5	1.48 (1.13-1.95)	0.101493	1.18 (0.9-1.55)	1	1.31 (0.98-1.75)	1	1.53 (1.13-2.08)	0.123706	1.44 (1.04-2.01)	0.543621	1.14 (0.82-1.59)	1	1.11 (0.78-1.59)	1	1.39 (0.94-2.07)	1	1.07 (0.7-1.65)	1	1.1 (0.7-1.73)	1	1.61 (0.92-2.89)	1	1.17 (0.66-2.08)	1	1.38 (0.74-2.64)	1	1.52 (0.73-3.27)	1	1.33 (0.58-3.1)	1	1.8 (0.72-4.7)	1	2.25 (0.84-6.48)	1	2.92 (1.04-9.09)	0.980215	2.52 (0.48-18.91)	1	1 (0.17-5.82)	1
Total cholesterol	2	0.03	1	-0.01	1	-0.04	1	0	1	-0.08	1	-0.08	1	-0.09	1	-0.16	0.546933	-0.11	1	-0.13	1	-0.09	1	0.04	1	0	1	0.06	1	-0.13	1	0.07	1	-0.03	1	-0.29	1	-0.02	1	-0.12	1
Total cholesterol	3	-0.05	1	-0.01	1	-0.06	1	-0.03	1	-0.08	1	-0.1	1	-0.13	0.945511	-0.13	0.976525	-0.06	1	-0.09	1	0.04	1	0.03	1	-0.02	1	0	1	-0.03	1	0.04	1	-0.32	1	-0.25	1	-0.23	1	-0.16	1
Total cholesterol	4	-0.02	1	-0.03	1	-0.08	1	-0.05	1	-0.08	1	-0.07	1	-0.14	0.702277	-0.2	0.0291309	-0.06	1	-0.07	1	0.03	1	0.01	1	-0.11	1	-0.13	1	-0.22	1	-0.17	1	-0.27	1	-0.42	0.247901	-0.34	1	-0.13	1
Total cholesterol	5	0.05	1	0.02	1	0.04	1	0.05	1	-0.04	1	-0.02	1	-0.04	1	-0.06	1	0.04	1	-0.01	1	0.03	1	0.1	1	0.14	0.962886	0.18	1	0.04	1	0.11	1	-0.24	1	-0.28	1	-0.18	1	-0.21	1
eGFR	2	-1.65	1	-3.62	0.948659	-3.04	1	-2.76	1	-1.97	1	-2.42	1	-5.48	1	-1.12	1	0.21	1	-0.81	1	1.21	1	1.43	1	-2.64	1	-2.9	1	-4.78	1	-2.59	1	-2.62	1	5.23	1	1.48	1	10.84	1
eGFR	3	-2.37	1	-3.45	1	-2.41	1	-2.33	1	-0.09	1	0.7	1	-4.97	1	0.4	1	3.43	1	-1.44	1	-2.49	1	-0.2	1	2.46	1	-3.38	1	-2.87	1	-7.68	0.243339	4.66	1	5.53	1	5.2	1	-3.15	1
eGFR	4	-0.96	1	-4.26	1	-4.59	1	-4.4	1	-3.6	1	-2.07	1	-4.91	1	-2.51	1	-3	1	-4.69	0.68127	-4.05	1	-5.01	1	2.25	1	-1.71	1	-4.76	1	-1.06	1	0.51	1	4.03	1	-5.14	1	-5.62	1
eGFR	5	-3.7	1	-5.73	0.33734	-4.3	1	-5.77	0.981395	-4.46	1	-3.39	1	-6.64	1	-2.99	1	-2.42	1	-3.66	1	-0.12	1	-3.45	1	-5.6	1	-2.68	1	-2.47	1	-3.94	1	-3.36	1	-1.89	1	-5.11	1	-5.41	1
