# Supplementary material for: Visit-to-visit variability of glycemia and vascular complications: the Hoorn Diabetes Care System cohort
Source: Cardiovasc Diabetol. 2019 Dec 12;18:170. doi: 10.1186/s12933-019-0975-1 (PMC6909524; doi:10.1186/s12933-019-0975-1)
Supplement: Supplementary file 6 — Additional file 6: Table S3. Unadjusted and adjusted effect sizes of models with FG-CV for each quintile. [file 12933_2019_975_MOESM6_ESM.xlsx]

## Sheet: Blad1
Table S4. Unadjusted and adjusted effect sizes of models with HbA1c-CV for each quintiles.
Unadjusted		1		2		3		4		5		6		7		8		9		10		11		12		13		14		15		16		17		18		19		20
Variable	Quintile	Beta (95%CI)	Adjusted P-value	Beta (95%CI)	Adjusted P-value	Beta (95%CI)	Adjusted P-value	Beta (95%CI)	Adjusted P-value	Beta (95%CI)	Adjusted P-value	Beta (95%CI)	Adjusted P-value	Beta (95%CI)	Adjusted P-value	Beta (95%CI)	Adjusted P-value	Beta (95%CI)	Adjusted P-value	Beta (95%CI)	Adjusted P-value	Beta (95%CI)	Adjusted P-value	Beta (95%CI)	Adjusted P-value	Beta (95%CI)	Adjusted P-value	Beta (95%CI)	Adjusted P-value	Beta (95%CI)	Adjusted P-value	Beta (95%CI)	Adjusted P-value	Beta (95%CI)	Adjusted P-value	Beta (95%CI)	Adjusted P-value	Beta (95%CI)	Adjusted P-value	Beta (95%CI)	Adjusted P-value
Sex	2	1.09 (0.9-1.33)	1	0.95 (0.78-1.15)	1	1.14 (0.93-1.4)	1	1.12 (0.91-1.39)	1	1.15 (0.92-1.43)	1	1.26 (1-1.59)	1	1.16 (0.91-1.49)	1	1.19 (0.91-1.56)	1	1.07 (0.8-1.44)	1	1.14 (0.83-1.56)	1	1.32 (0.94-1.85)	1	1.21 (0.83-1.77)	1	0.95 (0.62-1.46)	1	1.52 (0.94-2.47)	1	0.82 (0.48-1.39)	1	0.98 (0.55-1.73)	1	1.06 (0.55-2.04)	1	1.19 (0.57-2.46)	1	0.76 (0.33-1.76)	1	0.24 (0.09-0.59)	0.049159
Sex	3	1.17 (0.96-1.43)	1	1.09 (0.89-1.33)	1	1.02 (0.83-1.25)	1	1.33 (1.08-1.65)	0.173276	1.39 (1.11-1.73)	0.080227	1.46 (1.16-1.85)	0.0295681	1.42 (1.11-1.83)	0.113341	1.35 (1.03-1.76)	0.548354	1.22 (0.91-1.63)	1	1.67 (1.22-2.29)	0.0264673	1.32 (0.94-1.85)	1	1.2 (0.83-1.75)	1	0.81 (0.52-1.24)	1	1.43 (0.89-2.32)	1	1 (0.59-1.69)	1	0.9 (0.51-1.59)	1	0.85 (0.44-1.63)	1	1.15 (0.55-2.39)	1	0.35 (0.15-0.84)	0.392848	0.54 (0.22-1.31)	1
Sex	4	1.38 (1.13-1.68)	0.0289202	1.24 (1.02-1.51)	0.621716	1.29 (1.05-1.58)	0.290355	1.54 (1.25-1.91)	0.00139206	1.64 (1.32-2.06)	0.00025319	1.59 (1.26-2.02)	0.0020314	1.51 (1.17-1.94)	0.026614	1.65 (1.26-2.16)	0.00511152	1.43 (1.07-1.91)	0.333041	1.73 (1.26-2.37)	0.012978	1.47 (1.05-2.05)	0.525615	1.25 (0.86-1.82)	1	0.93 (0.61-1.43)	1	1.16 (0.72-1.88)	1	0.98 (0.58-1.66)	1	1.5 (0.84-2.67)	1	1 (0.52-1.92)	1	0.64 (0.3-1.33)	1	0.69 (0.3-1.6)	1	0.4 (0.16-0.97)	0.930108
Sex	5	1.55 (1.28-1.9)	0.000257168	1.51 (1.24-1.84)	0.000947738	1.37 (1.12-1.68)	0.0509756	1.39 (1.13-1.73)	0.0446286	1.49 (1.19-1.86)	0.00854833	1.74 (1.37-2.2)	8.67566e-05	1.74 (1.35-2.23)	0.000365602	1.74 (1.33-2.27)	0.00114138	1.52 (1.14-2.04)	0.0917042	1.45 (1.06-1.99)	0.380527	1.5 (1.07-2.1)	0.37813	1.29 (0.89-1.89)	1	0.92 (0.6-1.41)	1	1.48 (0.91-2.39)	1	0.88 (0.52-1.49)	1	1.37 (0.78-2.45)	1	0.85 (0.44-1.63)	1	0.9 (0.44-1.87)	1	0.43 (0.18-1.01)	1	0.24 (0.09-0.59)	0.049159
Time since diagnosis	2	-1.39	0.164959	-0.41	1	-0.73	1	-1.16	0.683485	-2.16	0.00210577	-1.63	0.103422	-1.04	1	-0.41	1	-0.4	1	-1.13	1	-1.28	1	-2.96	0.0170221	-0.55	1	-0.61	1	0.18	1	3.1	0.223184	0.13	1	-1.78	1	0.29	1	1.35	1
Time since diagnosis	3	-1.8	0.0115861	-1.66	0.0266163	-1.36	0.203204	-1.65	0.0510625	-2.97	1.96715e-06	-2.18	0.00358436	-1.07	1	-0.68	1	-1.68	0.327384	-1.83	0.291676	-1.9	0.340653	-3.09	0.00964144	0.03	1	-1	1	-0.67	1	0.6	1	0.08	1	-1.05	1	3.97	0.518605	0.67	1
Time since diagnosis	4	-3.84	5.7454e-12	-3.02	1.24534e-07	-3	2.95124e-07	-2.9	2.33954e-06	-3.25	1.16596e-07	-1.96	0.0158982	-1.95	0.035771	-1.13	1	-1.56	0.496868	-2.82	0.00340371	-1.97	0.265475	-2.93	0.0184459	-0.69	1	-1.59	1	-1.79	1	0.43	1	0.77	1	1.55	1	2.74	1	2.57	1
Time since diagnosis	5	-4.88	4.24231e-19	-4	2.9259e-13	-4.62	6.93204e-17	-3.97	9.42276e-12	-4.61	3.61909e-15	-3.69	5.56101e-09	-3.24	4.22389e-06	-2.34	0.00730626	-3.24	7.05017e-05	-2.7	0.00637436	-2.69	0.0143278	-3.76	0.000432041	-1.65	1	-1.98	1	-1.19	1	-0.04	1	-0.81	1	-1.63	1	1.13	1	1.06	1
BMI	2	0.63	0.297368	0.66	0.255758	0.55	0.863452	0.62	0.564904	0.4	1	0.95	0.0496829	0.84	0.225673	0.91	0.193198	0.63	1	0.69	1	0.55	1	0.56	1	0.89	1	0.43	1	0.06	1	0.45	1	-0.47	1	-0.29	1	0.54	1	1.21	1
BMI	3	0.88	0.0125846	0.67	0.221098	1.06	0.00213658	1.42	1.22186e-05	0.88	0.054885	0.68	0.596155	1.07	0.0240049	0.75	0.669134	0.89	0.384793	1.21	0.0691882	0.63	1	0.98	0.98529	0.78	1	0.03	1	1.18	1	0.58	1	0.26	1	1.15	1	0.82	1	2.83	0.480686
BMI	4	1.45	3.79436e-07	1.42	1.72771e-06	1.92	5.20677e-11	1.9	5.70193e-10	1.23	0.000595298	1.2	0.00261459	1.28	0.00231062	1.5	0.000408733	1.52	0.00140493	1.8	0.000279725	1.15	0.1672	1.02	0.821872	1.16	0.962308	0.93	1	1.87	0.204988	3.02	0.00325578	2.62	0.0388105	0.92	1	0.66	1	1.23	1
BMI	5	1.98	4.01568e-13	2.13	2.22551e-14	2.58	1.37796e-19	2.47	1.10243e-16	2.51	3.85888e-16	2.26	1.26838e-11	2.12	3.37617e-09	2.33	7.4516e-10	2.41	7.00374e-09	2.36	2.54212e-07	2.68	1.62281e-08	2.43	2.47973e-05	2.29	0.0019628	1.74	0.13294	1.76	0.325254	1.24	1	1.55	1	2.74	0.0980526	2.48	0.493268	2.12	1
HDL	2	-0.04	0.527958	-0.02	1	-0.05	0.103245	-0.06	0.00850964	-0.05	0.0618344	-0.06	0.0808434	-0.04	1	-0.06	0.09337	-0.03	1	-0.09	0.0105941	-0.07	0.227168	-0.08	0.145958	-0.05	1	-0.07	1	-0.02	1	-0.11	0.767902	-0.02	1	0	1	-0.05	1	-0.09	1
HDL	3	-0.09	1.43328e-06	-0.08	2.36985e-05	-0.07	0.000298175	-0.13	2.17994e-12	-0.1	4.49378e-06	-0.1	1.22454e-05	-0.09	0.000184798	-0.08	0.00494051	-0.06	0.122482	-0.12	1.68958e-05	-0.13	0.000128175	-0.12	0.00158603	-0.07	1	-0.11	0.208444	-0.07	1	-0.11	0.545693	-0.12	0.802651	0.05	1	-0.04	1	-0.03	1
HDL	4	-0.13	5.22358e-14	-0.13	1.21989e-13	-0.13	1.74487e-13	-0.16	2.48551e-18	-0.12	2.11192e-10	-0.14	3.27432e-12	-0.15	8.13399e-11	-0.13	3.28478e-08	-0.12	7.48588e-06	-0.15	1.80311e-08	-0.11	0.00104011	-0.1	0.0290496	-0.09	0.322824	-0.11	0.221411	-0.09	1	-0.14	0.103041	-0.14	0.399186	-0.06	1	-0.13	1	-0.13	1
HDL	5	-0.15	7.03431e-21	-0.16	7.8396e-22	-0.15	3.98114e-18	-0.18	5.35295e-22	-0.16	8.68177e-17	-0.15	1.66058e-13	-0.13	8.42506e-09	-0.14	1.33089e-09	-0.14	8.53288e-08	-0.18	8.48402e-12	-0.15	5.0182e-06	-0.14	0.000129368	-0.07	0.944897	-0.12	0.110449	-0.07	1	-0.17	0.0144967	-0.18	0.0507005	-0.15	0.288593	-0.15	0.836265	-0.21	0.210593
Triaglycerol (log10)	2	0.03	0.0940588	0.02	0.807827	0.02	1	0.01	1	0.03	0.647059	0.02	1	0	1	0.02	1	0.02	1	0.01	1	0.02	1	0.05	0.208711	0.03	1	0.04	1	0.04	1	0.04	1	0	1	0.01	1	-0.02	1	0.01	1
Triaglycerol (log10)	3	0.05	3.28714e-05	0.06	3.75222e-06	0.05	0.00487671	0.05	0.000156189	0.03	0.337326	0.03	1	0.02	1	0.05	0.640062	0.04	0.264307	0.03	1	0.04	0.123302	0.03	1	0.05	0.44624	0.09	0.106251	0.07	0.117775	0.06	0.280269	0.03	1	-0.03	1	-0.02	1	0.01	1
Triaglycerol (log10)	4	0.06	1.42616e-07	0.07	2.729e-12	0.06	3.94756e-08	0.06	1.62651e-05	0.05	0.00455236	0.05	0.137544	0.05	0.0839783	0.06	0.00297019	0.05	0.0014429	0.05	0.00869512	0.05	0.0158218	0.04	0.375983	0.05	0.2735	0.07	0.291942	0.07	0.235739	0.09	0.00814647	0.09	0.189989	0.04	1	0.04	1	0.05	1
Triaglycerol (log10)	5	0.09	7.93907e-20	0.1	1.0292e-20	0.09	3.16037e-15	0.09	3.09366e-13	0.09	1.44459e-10	0.07	3.37473e-06	0.06	0.00119582	0.08	5.61085e-06	0.08	1.27222e-06	0.07	0.000594802	0.06	0.00166948	0.07	0.00126274	0.07	0.0131058	0.09	0.00867268	0.1	0.00712492	0.09	0.0386394	0.09	0.0697695	0.08	0.0959455	0.05	1	0.11	0.193332
SBP	2	0.04	1	1.38	1	0.72	1	0.32	1	1.46	1	1.22	1	3.65	0.0236686	1.11	1	1.78	1	1.38	1	0.96	1	-3.16	1	1.94	1	0.72	1	1.68	1	-1.13	1	-1.86	1	-1.6	1	-1.7	1	-1.83	1
SBP	3	0.82	1	1.32	1	0.9	1	1.05	1	0.43	1	0.18	1	2.62	0.397248	1.98	1	1.6	1	-0.34	1	0.04	1	-3.82	0.487138	2.04	1	-0.1	1	2.02	1	0.61	1	0.83	1	1.45	1	-1.21	1	-3.68	1
SBP	4	-0.53	1	0.79	1	1.05	1	1.12	1	0.58	1	1.78	1	2.85	0.227134	2.49	0.904883	1.92	1	1.43	1	0.4	1	-0.85	1	1.27	1	0.94	1	3.35	1	3.24	1	3.97	1	6.29	1	6.82	1	-4.79	1
SBP	5	-0.56	1	1.06	1	0.75	1	0.8	1	1.34	1	1.47	1	2.03	1	1.46	1	1.16	1	-0.63	1	0.51	1	-1.1	1	2.39	1	-1.53	1	2.72	1	-2.56	1	-2.67	1	4.71	1	4.4	1	-3	1
DBP	2	0.46	1	0.79	0.855006	0.6	1	0.43	1	1.17	0.123054	0.9	0.932771	1.11	0.441333	-0.21	1	1.14	0.758599	0.36	1	0.37	1	0.43	1	-0.1	1	0.22	1	0.38	1	-0.78	1	-1.63	1	1.08	1	0.07	1	-1.96	1
DBP	3	0.48	1	0.81	0.761646	0.35	1	0.89	0.654792	1.34	0.0358082	0.91	0.881228	1.25	0.196073	0.79	1	0.46	1	0.43	1	0.57	1	0.02	1	0.95	1	0.71	1	1.51	1	-0.23	1	0.18	1	0.73	1	-2.77	1	-4.13	0.285807
DBP	4	0.78	0.889726	1.27	0.0223768	1.36	0.0159707	1.53	0.00536953	1.98	7.8399e-05	1.14	0.232177	1.1	0.471077	0.51	1	0.9	1	1.72	0.0635317	1.22	0.982759	0.91	1	0.15	1	0.54	1	0.47	1	1.28	1	-1.31	1	0.52	1	-0.28	1	-6.5	0.00272015
DBP	5	1.44	0.00457363	1.7	0.000257608	1.59	0.00178944	1.52	0.0058207	2.06	3.07217e-05	1.5	0.0197012	1.51	0.0371817	0.86	1	2.01	0.00473609	0.61	1	0.76	1	0.56	1	0.87	1	0.26	1	0.72	1	-0.06	1	-1.27	1	0.96	1	-1.06	1	-2.73	1
Smoking	2	0.9 (0.69-1.18)	1	0.79 (0.61-1.04)	1	0.92 (0.7-1.22)	1	0.8 (0.59-1.07)	1	1.04 (0.76-1.41)	1	1.01 (0.74-1.38)	1	0.98 (0.7-1.38)	1	1.08 (0.74-1.56)	1	0.83 (0.55-1.26)	1	0.95 (0.61-1.48)	1	1.07 (0.64-1.8)	1	0.75 (0.44-1.28)	1	0.91 (0.49-1.67)	1	1.15 (0.55-2.44)	1	1.41 (0.62-3.29)	1	1.7 (0.68-4.51)	1	2.24 (0.87-6.27)	1	2.43 (0.82-8.18)	1	1.89 (0.53-7.72)	1	1.37 (0.28-7.35)	1
Smoking	3	1.03 (0.8-1.34)	1	0.9 (0.69-1.17)	1	1.15 (0.88-1.51)	1	1.13 (0.85-1.49)	1	1.27 (0.95-1.72)	1	0.97 (0.71-1.33)	1	0.89 (0.63-1.27)	1	0.91 (0.62-1.33)	1	0.86 (0.56-1.29)	1	0.92 (0.59-1.44)	1	1.14 (0.69-1.91)	1	0.84 (0.5-1.41)	1	1 (0.55-1.83)	1	1.56 (0.78-3.21)	1	1.31 (0.57-3.09)	1	1.26 (0.48-3.46)	1	0.84 (0.26-2.67)	1	1.22 (0.35-4.48)	1	1.58 (0.42-6.59)	1	1.76 (0.4-9.08)	1
Smoking	4	1.41 (1.1-1.81)	0.138763	1.04 (0.81-1.35)	1	1.14 (0.87-1.5)	1	1.07 (0.81-1.42)	1	1.2 (0.89-1.63)	1	1 (0.73-1.37)	1	1.03 (0.73-1.45)	1	1.29 (0.9-1.86)	1	1.06 (0.71-1.58)	1	0.71 (0.44-1.14)	1	0.86 (0.5-1.47)	1	0.52 (0.29-0.92)	0.514698	0.95 (0.52-1.75)	1	1.47 (0.73-3.05)	1	1.74 (0.79-3.99)	1	2.18 (0.91-5.63)	1	2.05 (0.78-5.77)	1	1.43 (0.43-5.09)	1	1 (0.22-4.49)	1	1.37 (0.28-7.35)	1
Smoking	5	1.45 (1.13-1.86)	0.0691405	1.24 (0.97-1.59)	1	1.4 (1.08-1.82)	0.237692	1.16 (0.88-1.53)	1	1.27 (0.94-1.72)	1	1.27 (0.94-1.72)	1	1.32 (0.95-1.83)	1	1.17 (0.81-1.69)	1	1.17 (0.79-1.73)	1	1 (0.64-1.55)	1	1.14 (0.68-1.9)	1	0.75 (0.44-1.27)	1	0.68 (0.35-1.3)	1	1.15 (0.55-2.44)	1	1.41 (0.62-3.29)	1	1.55 (0.61-4.15)	1	1.33 (0.47-3.92)	1	1.66 (0.52-5.82)	1	1.58 (0.42-6.59)	1	1.76 (0.4-9.08)	1
Total cholesterol	2	-0.01	1	0.06	1	0.01	1	-0.04	1	-0.05	1	-0.02	1	0	1	-0.09	1	0	1	-0.08	1	0.01	1	0.01	1	0.09	1	0.25	0.450568	0.06	1	0.01	1	-0.23	1	-0.07	1	-0.15	1	-0.3	1
Total cholesterol	3	-0.06	1	0.03	1	0.01	1	-0.04	1	-0.06	1	-0.05	1	-0.01	1	0.01	1	-0.01	1	-0.13	1	-0.08	1	0	1	0.04	1	0.2	1	0.02	1	-0.06	1	-0.29	1	-0.28	1	-0.41	0.743422	-0.26	1
Total cholesterol	4	-0.04	1	0.06	1	0.03	1	-0.05	1	-0.02	1	-0.05	1	-0.01	1	-0.01	1	0.04	1	-0.07	1	-0.05	1	-0.06	1	0.1	1	0.15	1	0.12	1	0.06	1	-0.06	1	-0.05	1	-0.09	1	-0.41	0.929846
Total cholesterol	5	0.09	1	0.11	0.28198	0.09	1	0.05	1	-0.01	1	0.03	1	0.05	1	0.04	1	0.11	1	0.07	1	0.14	1	0.12	1	0.2	0.874295	0.18	1	0.16	1	-0.04	1	-0.24	1	-0.2	1	-0.18	1	-0.28	1
eGFR	2	2.03	1	3.04	1	1.33	1	-1.3	1	1.43	1	1.62	1	-1.93	1	-3.25	1	-0.73	1	-0.19	1	1.17	1	-1.77	1	-4.48	1	-5.54	0.806773	-1.94	1	-3.25	1	3.79	1	6.33	1	1.27	1	8	0.486957
eGFR	3	1	1	-0.32	1	-0.67	1	-0.98	1	-0.26	1	-2.74	1	-1.9	1	-3.43	1	-0.32	1	0.57	1	2.66	1	2.83	1	-2.41	1	-2.82	1	-1.19	1	-3.87	1	-1.14	1	-0.07	1	11.16	1	5.64	1
eGFR	4	0.58	1	0.14	1	-0.33	1	-2.5	1	-2.98	1	-3.04	1	-0.79	1	-2.69	1	-2.85	1	0.8	1	1.73	1	-3.34	1	2.09	1	-2.48	1	-3.66	1	-6.05	0.600403	-4.25	1	-0.99	1	-5.61	1	3.53	1
eGFR	5	0.53	1	-1.57	1	-0.82	1	-2.42	1	-0.92	1	-0.81	1	-2.16	1	-3.81	1	3.43	1	-2.01	1	0.79	1	-2.9	1	-3.48	1	-7.6	0.0999577	-3.15	1	-6.97	0.250016	-4.44	1	-5.01	1	-1.12	1	3.59	1
Adjusted model		1		2		3		4		5		6		7		8		9		10		11		12		13		14		15		16		17		18		19		20
Variable	Quintile	Beta (95%CI)	Adjusted P-value	Beta (95%CI)	Adjusted P-value	Beta (95%CI)	Adjusted P-value	Beta (95%CI)	Adjusted P-value	Beta (95%CI)	Adjusted P-value	Beta (95%CI)	Adjusted P-value	Beta (95%CI)	Adjusted P-value	Beta (95%CI)	Adjusted P-value	Beta (95%CI)	Adjusted P-value	Beta (95%CI)	Adjusted P-value	Beta (95%CI)	Adjusted P-value	Beta (95%CI)	Adjusted P-value	Beta (95%CI)	Adjusted P-value	Beta (95%CI)	Adjusted P-value	Beta (95%CI)	Adjusted P-value	Beta (95%CI)	Adjusted P-value	Beta (95%CI)	Adjusted P-value	Beta (95%CI)	Adjusted P-value	Beta (95%CI)	Adjusted P-value	Beta (95%CI)	Adjusted P-value
Sex	2	1.06 (0.87-1.3)	1	0.93 (0.77-1.14)	1	1.12 (0.91-1.37)	1	1.09 (0.88-1.35)	1	1.09 (0.87-1.37)	1	1.23 (0.97-1.56)	1	1.14 (0.88-1.47)	1	1.2 (0.92-1.58)	1	1.08 (0.8-1.44)	1	1.14 (0.83-1.58)	1	1.33 (0.94-1.88)	1	1.13 (0.77-1.66)	1	0.97 (0.63-1.49)	1	1.52 (0.94-2.49)	1	0.82 (0.48-1.4)	1	1.12 (0.63-2.02)	1	1.07 (0.55-2.09)	1	1.09 (0.52-2.29)	1	0.76 (0.32-1.81)	1	0.26 (0.1-0.65)	0.0959838
Sex	3	1.13 (0.92-1.38)	1	1.05 (0.86-1.28)	1	0.97 (0.79-1.19)	1	1.27 (1.02-1.58)	0.598986	1.3 (1.03-1.63)	0.484277	1.42 (1.12-1.8)	0.0855324	1.41 (1.09-1.82)	0.179395	1.38 (1.05-1.82)	0.407785	1.19 (0.89-1.6)	1	1.7 (1.23-2.35)	0.0277153	1.32 (0.93-1.87)	1	1.17 (0.79-1.73)	1	0.85 (0.55-1.32)	1	1.45 (0.89-2.38)	1	0.97 (0.57-1.67)	1	0.93 (0.51-1.68)	1	0.86 (0.43-1.69)	1	1.07 (0.51-2.28)	1	0.45 (0.18-1.1)	1	0.61 (0.24-1.53)	1
Sex	4	1.28 (1.04-1.57)	0.409969	1.15 (0.94-1.42)	1	1.17 (0.94-1.44)	1	1.43 (1.15-1.79)	0.0320488	1.53 (1.21-1.93)	0.00684966	1.57 (1.23-2.01)	0.00544347	1.46 (1.13-1.9)	0.0857004	1.7 (1.29-2.25)	0.00380276	1.41 (1.05-1.9)	0.475219	1.73 (1.25-2.41)	0.0222201	1.51 (1.06-2.15)	0.434974	1.25 (0.84-1.85)	1	1.01 (0.65-1.58)	1	1.18 (0.72-1.95)	1	0.91 (0.53-1.55)	1	1.56 (0.86-2.84)	1	1.05 (0.54-2.07)	1	0.67 (0.31-1.42)	1	0.83 (0.34-2.02)	1	0.5 (0.19-1.28)	1
Sex	5	1.4 (1.12-1.75)	0.0674436	1.36 (1.09-1.7)	0.113665	1.16 (0.93-1.46)	1	1.25 (0.99-1.57)	1	1.34 (1.05-1.71)	0.340429	1.68 (1.3-2.16)	0.00147267	1.65 (1.25-2.17)	0.0074701	1.79 (1.34-2.4)	0.00183984	1.47 (1.08-2.01)	0.291044	1.51 (1.08-2.13)	0.346493	1.59 (1.1-2.3)	0.277473	1.32 (0.88-1.98)	1	1.02 (0.65-1.62)	1	1.53 (0.91-2.56)	1	0.83 (0.48-1.44)	1	1.4 (0.77-2.58)	1	0.83 (0.41-1.66)	1	0.8 (0.37-1.73)	1	0.45 (0.18-1.13)	1	0.28 (0.1-0.71)	0.177579
Time since diagnosis	2	-1.23	0.164959	-0.23	1	-0.47	1	-0.82	0.683485	-1.68	0.00210577	-0.95	0.103422	-0.5	1	0.15	1	0.06	1	-0.26	1	-0.41	1	-2.44	0.0170221	-0.21	1	-0.1	1	0.24	1	3.11	0.223184	0.37	1	-1.49	1	0.06	1	0.36	1
Time since diagnosis	3	-1.5	0.0115861	-1.23	0.0266163	-0.86	0.203204	-0.88	0.0510625	-2.08	1.96715e-06	-1.07	0.00358436	0.08	1	0.42	1	-0.67	0.327384	-0.24	0.291676	-0.8	0.340653	-1.92	0.00964144	0.62	1	-0.07	1	-0.07	1	0.87	1	0.66	1	-0.67	1	3.09	0.518605	0.36	1
Time since diagnosis	4	-3.28	5.7454e-12	-2.23	1.24534e-07	-2.11	2.95124e-07	-1.66	2.33954e-06	-1.79	1.16596e-07	-0.2	0.0158982	-0.4	0.035771	0.49	1	-0.29	0.496868	-0.91	0.00340371	-0.31	0.265475	-1.41	0.0184459	0.61	1	-0.22	1	-1.13	1	1.05	1	1.4	1	1.59	1	2.56	1	2.07	1
Time since diagnosis	5	-3.9	4.24231e-19	-2.63	2.9259e-13	-3.13	6.93204e-17	-2.13	9.42276e-12	-2.56	3.61909e-15	-0.98	5.56101e-09	-0.67	4.22389e-06	0.2	0.00730626	-1.03	7.05017e-05	-0.2	0.00637436	-0.25	0.0143278	-1.56	0.000432041	0.38	1	-0.07	1	0.05	1	0.7	1	0.06	1	-1.11	1	0.59	1	0.2	1
BMI	2	0.52	0.297368	0.54	0.255758	0.52	0.863452	0.53	0.564904	0.2	1	0.81	0.0496829	0.74	0.225673	0.89	0.193198	0.64	1	0.57	1	0.54	1	0.48	1	0.76	1	0.63	1	-0.16	1	0.6	1	-0.54	1	-0.44	1	0.27	1	-0.02	1
BMI	3	0.73	0.0125846	0.46	0.221098	0.85	0.00213658	1.31	1.22186e-05	0.65	0.054885	0.49	0.596155	0.99	0.0240049	0.7	0.669134	0.86	0.384793	1.21	0.0691882	0.54	1	0.88	0.98529	0.5	1	0.02	1	0.87	1	0.07	1	-0.21	1	0.86	1	0.08	1	1.91	0.480686
BMI	4	1.15	3.79436e-07	1.08	1.72771e-06	1.63	5.20677e-11	1.69	5.70193e-10	0.97	0.000595298	0.97	0.00261459	1.07	0.00231062	1.46	0.000408733	1.59	0.00140493	1.71	0.000279725	1.03	0.1672	0.94	0.821872	0.81	0.962308	0.57	1	1.48	0.204988	2.9	0.00325578	2.31	0.0388105	0.21	1	0.24	1	0.04	1
BMI	5	1.53	4.01568e-13	1.66	2.22551e-14	2.07	1.37796e-19	1.99	1.10243e-16	1.98	3.85888e-16	1.74	1.26838e-11	1.7	3.37617e-09	2.07	7.4516e-10	2.36	7.00374e-09	2.06	2.54212e-07	2.42	1.62281e-08	2.3	2.47973e-05	1.72	0.0019628	1.41	0.13294	0.99	0.325254	0.78	1	0.9	1	1.83	0.0980526	1.46	0.493268	0.41	1
HDL	2	-0.02	0.527958	-0.02	1	-0.03	0.103245	-0.05	0.00850964	-0.03	0.0618344	-0.03	0.0808434	-0.02	1	-0.04	0.09337	-0.02	1	-0.06	0.0105941	-0.04	0.227168	-0.06	0.145958	-0.04	1	-0.05	1	-0.03	1	-0.11	0.767902	-0.01	1	0.01	1	-0.05	1	-0.14	1
HDL	3	-0.06	1.43328e-06	-0.06	2.36985e-05	-0.06	0.000298175	-0.1	2.17994e-12	-0.06	4.49378e-06	-0.06	1.22454e-05	-0.05	0.000184798	-0.04	0.00494051	-0.03	0.122482	-0.07	1.68958e-05	-0.09	0.000128175	-0.09	0.00158603	-0.06	1	-0.08	0.208444	-0.06	1	-0.09	0.545693	-0.1	0.802651	0.07	1	-0.06	1	-0.03	1
HDL	4	-0.07	5.22358e-14	-0.08	1.21989e-13	-0.09	1.74487e-13	-0.11	2.48551e-18	-0.07	2.11192e-10	-0.09	3.27432e-12	-0.09	8.13399e-11	-0.08	3.28478e-08	-0.08	7.48588e-06	-0.1	1.80311e-08	-0.07	0.00104011	-0.05	0.0290496	-0.06	0.322824	-0.07	0.221411	-0.07	1	-0.1	0.103041	-0.11	0.399186	-0.04	1	-0.12	1	-0.14	1
HDL	5	-0.07	7.03431e-21	-0.09	7.8396e-22	-0.09	3.98114e-18	-0.11	5.35295e-22	-0.09	8.68177e-17	-0.08	1.66058e-13	-0.05	8.42506e-09	-0.06	1.33089e-09	-0.07	8.53288e-08	-0.12	8.48402e-12	-0.08	5.0182e-06	-0.08	0.000129368	-0.03	0.944897	-0.06	0.110449	-0.05	1	-0.12	0.0144967	-0.15	0.0507005	-0.12	0.288593	-0.15	0.836265	-0.23	0.210593
Triaglycerol (log10)	2	0.02	0.0940588	0.02	0.807827	0.02	1	0.01	1	0.02	0.647059	0.01	1	-0.01	1	0.02	1	0.02	1	0	1	0.02	1	0.04	0.208711	0.03	1	0.04	1	0.04	1	0.05	1	0	1	0.01	1	-0.03	1	-0.01	1
Triaglycerol (log10)	3	0.04	3.28714e-05	0.04	3.75222e-06	0.04	0.00487671	0.04	0.000156189	0.02	0.337326	0.01	1	0.01	1	0.03	0.640062	0.03	0.264307	0.02	1	0.03	0.123302	0.02	1	0.04	0.44624	0.07	0.106251	0.06	0.117775	0.05	0.280269	0.01	1	-0.04	1	-0.04	1	-0.02	1
Triaglycerol (log10)	4	0.04	1.42616e-07	0.05	2.729e-12	0.05	3.94756e-08	0.04	1.62651e-05	0.03	0.00455236	0.03	0.137544	0.03	0.0839783	0.05	0.00297019	0.04	0.0014429	0.03	0.00869512	0.03	0.0158218	0.02	0.375983	0.03	0.2735	0.04	0.291942	0.06	0.235739	0.08	0.00814647	0.07	0.189989	0.02	1	0.01	1	0.02	1
Triaglycerol (log10)	5	0.05	7.93907e-20	0.06	1.0292e-20	0.06	3.16037e-15	0.05	3.09366e-13	0.05	1.44459e-10	0.04	3.37473e-06	0.03	0.00119582	0.05	5.61085e-06	0.05	1.27222e-06	0.04	0.000594802	0.04	0.00166948	0.04	0.00126274	0.04	0.0131058	0.06	0.00867268	0.08	0.00712492	0.07	0.0386394	0.07	0.0697695	0.05	0.0959455	0.01	1	0.08	0.193332
SBP	2	0.92	1	1.44	1	1.08	1	0.91	1	2.7	1	2.13	1	4.22	0.0236686	1.4	1	2.03	1	1.81	1	1.64	1	-1.54	1	2.01	1	1.34	1	1.11	1	-3	1	-2.22	1	-0.81	1	-1.87	1	-4.03	1
SBP	3	1.88	1	2.12	1	1.33	1	1.88	1	2.15	1	1.32	1	3.09	0.397248	2.34	1	2.65	1	0.57	1	1.01	1	-2.39	0.487138	1.51	1	0.42	1	1.65	1	-0.49	1	-0.28	1	2	1	-3.35	1	-4.97	1
SBP	4	1.82	1	2.29	1	2.39	1	2.49	1	2.29	1	2.47	1	3.86	0.227134	3.21	0.904883	2.99	1	2.82	1	1.42	1	0.47	1	1.03	1	1.42	1	3.62	1	2.45	1	2.62	1	5.44	1	5.76	1	-7.51	1
SBP	5	2.13	1	2.86	1	2.58	1	2.28	1	3.41	1	2.78	1	3.43	1	2.73	1	3.15	1	0.28	1	1.6	1	0.4	1	2.55	1	-0.76	1	1.88	1	-3.4	1	-3.59	1	5.33	1	3.93	1	-5.42	1
DBP	2	0.24	1	0.68	0.855006	0.37	1	0.15	1	0.75	0.123054	0.43	0.932771	0.79	0.441333	-0.44	1	1.05	0.758599	0.02	1	0.02	1	-0.19	1	-0.18	1	-0.12	1	0.41	1	-0.15	1	-1.68	1	0.62	1	0.26	1	-1.13	1
DBP	3	0.1	1	0.44	0.761646	-0.04	1	0.35	0.654792	0.63	0.0358082	0.21	0.881228	0.72	0.196073	0.38	1	0.15	1	-0.25	1	0.11	1	-0.64	1	1.01	1	0.28	1	1.16	1	-0.2	1	0.06	1	0.41	1	-1.3	1	-3.88	0.285807
DBP	4	0.05	0.889726	0.58	0.0223768	0.56	0.0159707	0.65	0.00536953	1	7.8399e-05	0.25	0.232177	0.3	0.471077	-0.13	1	0.58	1	0.84	0.0635317	0.64	0.982759	0.22	1	0	1	0.04	1	-0.13	1	1.07	1	-1.32	1	1.04	1	0.66	1	-5.82	0.00272015
DBP	5	0.26	0.00457363	0.6	0.000257608	0.33	0.00178944	0.34	0.0058207	0.78	3.07217e-05	0.08	0.0197012	0.23	0.0371817	-0.15	1	1.43	0.00473609	-0.29	1	0.04	1	-0.28	1	0.48	1	-0.5	1	-0.05	1	-0.44	1	-1.75	1	0.63	1	-0.22	1	-2.08	1
Smoking	2	0.82 (0.63-1.08)	1	0.76 (0.58-1)	0.94283	0.86 (0.65-1.15)	1	0.74 (0.55-1)	0.947097	0.93 (0.68-1.27)	1	0.9 (0.65-1.24)	1	0.89 (0.63-1.26)	1	0.98 (0.67-1.43)	1	0.76 (0.49-1.16)	1	0.79 (0.5-1.25)	1	0.86 (0.5-1.46)	1	0.56 (0.32-0.97)	0.793006	0.84 (0.44-1.57)	1	1.11 (0.52-2.4)	1	1.49 (0.64-3.57)	1	2.44 (0.94-6.7)	1	2.38 (0.91-6.78)	1	2.32 (0.77-7.9)	1	2.02 (0.55-8.39)	1	1.44 (0.29-8.03)	1
Smoking	3	0.89 (0.68-1.16)	1	0.78 (0.6-1.02)	1	1.05 (0.8-1.39)	1	1 (0.75-1.34)	1	1.08 (0.8-1.47)	1	0.82 (0.59-1.13)	1	0.74 (0.51-1.06)	1	0.74 (0.49-1.1)	1	0.68 (0.44-1.04)	1	0.65 (0.41-1.05)	1	0.86 (0.51-1.47)	1	0.58 (0.33-1)	0.987635	0.99 (0.53-1.85)	1	1.45 (0.7-3.08)	1	1.34 (0.57-3.24)	1	1.33 (0.48-3.76)	1	0.95 (0.28-3.09)	1	1.2 (0.34-4.49)	1	2.24 (0.56-9.97)	1	1.92 (0.42-10.33)	1
Smoking	4	1.07 (0.82-1.4)	1	0.81 (0.62-1.07)	1	0.93 (0.7-1.24)	1	0.88 (0.66-1.18)	1	0.97 (0.71-1.34)	1	0.81 (0.58-1.12)	1	0.78 (0.55-1.12)	1	0.98 (0.67-1.44)	1	0.82 (0.54-1.25)	1	0.47 (0.28-0.77)	0.0611252	0.59 (0.33-1.04)	1	0.34 (0.18-0.61)	0.0101466	0.81 (0.42-1.54)	1	1.22 (0.57-2.66)	1	1.55 (0.68-3.65)	1	2.24 (0.89-6.03)	1	2.48 (0.92-7.24)	1	1.64 (0.47-6.07)	1	1.19 (0.25-5.6)	1	1.67 (0.32-9.58)	1
Smoking	5	0.96 (0.72-1.27)	1	0.87 (0.65-1.15)	1	1.05 (0.78-1.4)	1	0.89 (0.65-1.21)	1	0.97 (0.7-1.34)	1	0.91 (0.65-1.27)	1	0.84 (0.58-1.21)	1	0.72 (0.48-1.09)	1	0.73 (0.47-1.12)	1	0.6 (0.36-0.98)	0.796194	0.69 (0.39-1.22)	1	0.43 (0.24-0.78)	0.120928	0.5 (0.24-1)	1	0.92 (0.41-2.07)	1	1.26 (0.53-3.09)	1	1.41 (0.52-3.96)	1	1.48 (0.49-4.6)	1	1.61 (0.47-5.94)	1	1.76 (0.43-7.93)	1	1.81 (0.38-10.08)	1
Total cholesterol	2	-0.01	1	0.04	1	0.01	1	-0.04	1	-0.06	1	-0.01	1	0.01	1	-0.08	1	0	1	-0.11	1	0.01	1	0.01	1	0.07	1	0.27	0.450568	0.03	1	0.02	1	-0.22	1	-0.07	1	-0.19	1	-0.5	1
Total cholesterol	3	-0.08	1	0.01	1	-0.03	1	-0.04	1	-0.06	1	-0.04	1	0.01	1	0.02	1	-0.02	1	-0.14	1	-0.09	1	-0.03	1	0	1	0.2	1	0	1	-0.09	1	-0.31	1	-0.29	1	-0.53	0.743422	-0.36	1
Total cholesterol	4	-0.06	1	0.03	1	0	1	-0.05	1	-0.02	1	-0.06	1	0.01	1	0.01	1	0.05	1	-0.08	1	-0.08	1	-0.09	1	0.06	1	0.09	1	0.09	1	0.09	1	-0.06	1	-0.11	1	-0.14	1	-0.56	0.929846
Total cholesterol	5	0.03	1	0.06	0.28198	0.03	1	0	1	-0.05	1	-0.01	1	0.07	1	0.04	1	0.09	1	0	1	0.08	1	0.08	1	0.13	0.874295	0.12	1	0.09	1	-0.04	1	-0.28	1	-0.26	1	-0.31	1	-0.5	1
eGFR	2	1.7	1	2.67	1	1.48	1	-1.4	1	0.54	1	1.43	1	-2.14	1	-3.09	1	-0.83	1	-0.52	1	1.55	1	-3.28	1	-4.99	1	-4.49	0.806773	-2.64	1	-1.6	1	3.92	1	6.31	1	0.39	1	4.61	0.486957
eGFR	3	0.78	1	-0.77	1	-1.17	1	-0.6	1	-1.03	1	-2.78	1	-1.57	1	-3.25	1	-0.8	1	1.09	1	2.71	1	0.71	1	-3.4	1	-2.52	1	-1.93	1	-4.04	1	-2.51	1	0.43	1	9.85	1	4.96	1
eGFR	4	0.02	1	-0.46	1	-0.77	1	-2.05	1	-3.43	1	-2.78	1	-0.98	1	-2.24	1	-2.7	1	0.8	1	2.18	1	-5.52	1	1.18	1	-3.8	1	-5.31	1	-4.61	0.600403	-4.42	1	-1.23	1	-4.81	1	2.95	1
eGFR	5	-0.01	1	-1.74	1	-1.67	1	-2.68	1	-2.83	1	-1.53	1	-3.08	1	-4.48	1	2.58	1	-2.55	1	1.02	1	-5.97	1	-5.14	1	-8.48	0.0999577	-5.32	1	-6.21	0.250016	-6.24	1	-5.05	1	-2.8	1	0.98	1
